# Supplementary material
Source: publisher site journal article supplement (https://www.dovepress.com/article/245578)
Supplement: Supplementary file 1 [file get_supplementary_file.php]

**A**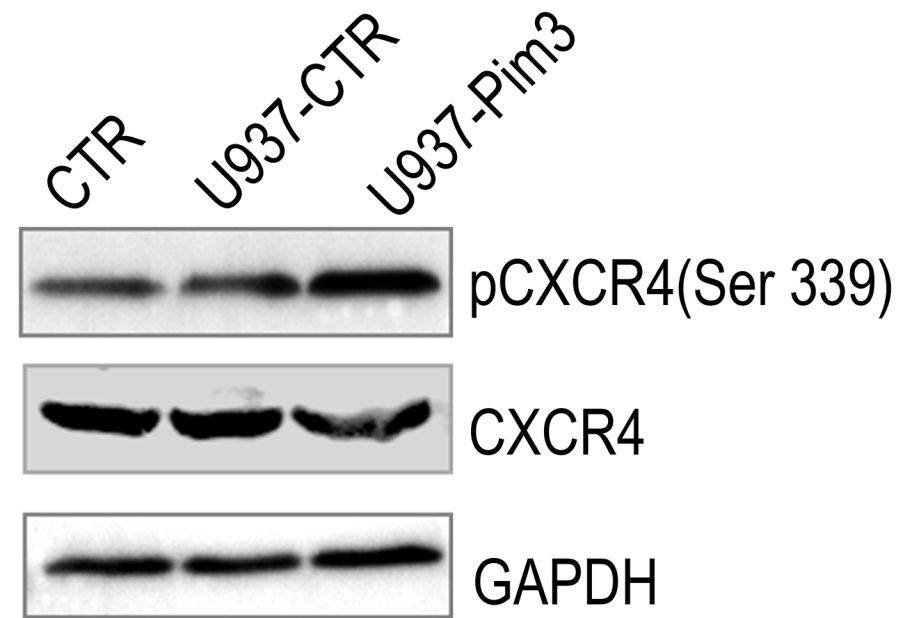**B**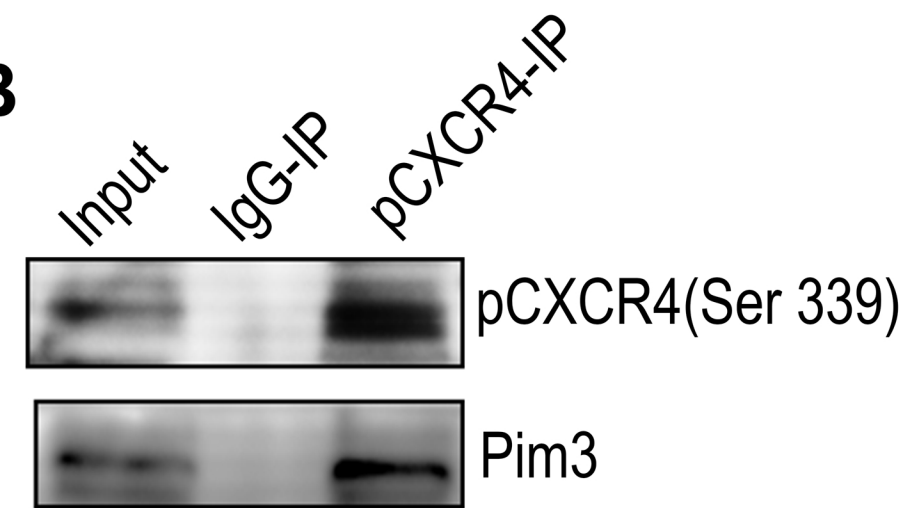**C**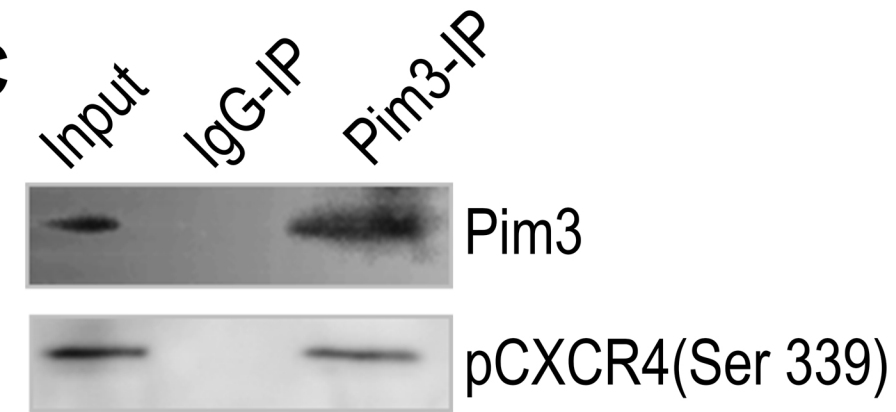

**Supplementary Figure 1. Pim3 interacts with pCXCR4 in U937 cells. A)** pCXCR4 (Ser339), CXCR4 were detected in control (U937-CTR) versus PIM3-overexpressing (U937-Pim3) U937 AML cells by western blotting. Blank CTR: normal U937 cells. **B)** Immunoprecipitation of PIM3 and pCXCR4(Ser339) and western blotting of pCXCR4(Ser339) and PIM3 (upper and lower panels, respectively). **C)** Immunoprecipitation of PIM3 and pCXCR4(Ser339) and western blotting of PIM3 and pCXCR4(Ser339) (upper and lower panels, respectively).
